# Supplementary material for: COVID-19 diagnosis by routine blood tests using machine learning
Source: PubMed Central journal article supplement (PMC8144373; doi:10.1038/s41598-021-90265-9), 2021-05-24
Supplement: 41598_2021_90265_MOESM1_ESM.pdf [file 41598_2021_90265_MOESM1_ESM.pdf]

# COVID-19 diagnosis by routine blood tests using machine learning

Matjaž Kukar,<sup>1,2\*</sup> Gregor Gunčar,<sup>1,3\*</sup> Tomaž Vovko,<sup>4</sup> Simon Podnar,<sup>5</sup> Peter Černelč,<sup>7</sup> Miran Brvar,<sup>6</sup> Mateja Zalaznik,<sup>4</sup> Mateja Notar,<sup>1</sup> Sašo Moškon,<sup>1</sup> Marko Notar<sup>#1</sup>

<sup>1</sup>Smart Blood Analytics Swiss SA, CH-8008 Zürich, Switzerland

<sup>2</sup>Faculty of Computer and Information Science, University of Ljubljana, Slovenia

<sup>3</sup>Faculty of Chemistry and Chemical Technology, University of Ljubljana, Slovenia

<sup>4</sup>Department of Infectious Diseases, University Medical Centre Ljubljana, Slovenia

<sup>5</sup>Division of Neurology, University Medical Centre Ljubljana, Slovenia

<sup>6</sup>Centre for Clinical Toxicology and Pharmacology, University Medical Centre Ljubljana, Slovenia

<sup>7</sup>Division of Internal Medicine, University Medical Centre Ljubljana, Slovenia

\*Joint first authors, contributed equally.

<sup>#</sup>Corresponding author [marko@sba-swiss.com](mailto:marko@sba-swiss.com)

**Supplementary Table S1 Blood Parameters, sex, and age values used in the COVID-19 ML model.** For each parameter, its mean, standard deviation, mean and interquartile range is given separately for: BAC- bacterial, VIR- viral (excluding COVID-19) or COVID- COVID-19 infection.

| parameter                                 | unit    | disease | median  | mean    | st. dev. | inter-quartile range |
|-------------------------------------------|---------|---------|---------|---------|----------|----------------------|
| Leukocyte count                           | 1E9/L   | COVID   | 5.150   | 5.829   | 2.827    | 4-6.9                |
|                                           |         | BAC     | 9.100   | 10.843  | 7.085    | 6.6-13.3             |
|                                           |         | VIR     | 6.100   | 6.367   | 4.015    | 4.5-7.7              |
| Erythrocyte count                         | 1E12/L  | COVID   | 4.830   | 4.693   | 0.636    | 4.38-5.07            |
|                                           |         | BAC     | 3.860   | 3.853   | 0.746    | 3.35-4.36            |
|                                           |         | VIR     | 4.540   | 4.453   | 0.656    | 4.07-4.91            |
| Hemoglobin                                | g/L     | COVID   | 144.500 | 141.769 | 19.722   | 131-153              |
|                                           |         | BAC     | 116.000 | 115.406 | 21.835   | 100-130              |
|                                           |         | VIR     | 137.000 | 134.854 | 18.581   | 123-148              |
| Hematocrit                                | 1       | COVID   | 0.421   | 0.415   | 0.055    | 0.385-0.447          |
|                                           |         | BAC     | 0.345   | 0.345   | 0.064    | 0.304-0.388          |
|                                           |         | VIR     | 0.413   | 0.407   | 0.053    | 0.375-0.444          |
| Mean Corpuscular Volume                   | fL      | COVID   | 88.900  | 88.543  | 4.537    | 86-90.8              |
|                                           |         | BAC     | 89.700  | 90.045  | 7.096    | 86-93.9              |
|                                           |         | VIR     | 91.600  | 91.760  | 6.028    | 88.4-95              |
| Mean Corpuscular Hemoglobin               | pg/cell | COVID   | 30.300  | 30.238  | 1.677    | 29.4-31.3            |
|                                           |         | BAC     | 30.100  | 30.065  | 2.622    | 28.6-31.5            |
|                                           |         | VIR     | 30.500  | 30.410  | 2.220    | 29.3-31.7            |
| Mean Corpuscular Hemoglobin Concentration | g/L     | COVID   | 342.500 | 342.344 | 9.763    | 339-347              |
|                                           |         | BAC     | 334.000 | 333.773 | 14.496   | 325-343              |
|                                           |         | VIR     | 332.000 | 331.376 | 9.410    | 325-337              |
| Erythrocyte Distribution Width            | 1       | COVID   | 0.134   | 0.139   | 0.028    | 0.129-0.141          |
|                                           |         | BAC     | 0.148   | 0.152   | 0.024    | 0.138-0.163          |
|                                           |         | VIR     | 0.134   | 0.139   | 0.018    | 0.128-0.145          |
| Thrombocytes count                        | 1E9/L   | COVID   | 175.000 | 191.163 | 78.434   | 146-222              |
|                                           |         | BAC     | 218.000 | 234.925 | 115.945  | 157-291              |
|                                           |         | VIR     | 174.000 | 176.393 | 74.149   | 126-220              |
| Mean Platelet Volume                      | fL      | COVID   | 9.100   | 9.236   | 0.943    | 8.6-9.8              |
|                                           |         | BAC     | 8.700   | 8.855   | 1.286    | 8-9.6                |
|                                           |         | VIR     | 8.700   | 8.782   | 1.038    | 8.1-9.4              |
| Lymphocyte count                          | 1E9/L   | COVID   | 1.200   | 1.327   | 0.718    | 0.8-1.6              |
|                                           |         | BAC     | 1.000   | 1.328   | 2.761    | 0.6-1.51             |
|                                           |         | VIR     | 1.700   | 1.876   | 2.528    | 1.2-2.3              |
| Monocyte count                            | 1E9/L   | COVID   | 0.405   | 0.520   | 0.325    | 0.34-0.617           |
|                                           |         | BAC     | 0.500   | 0.571   | 0.449    | 0.3-0.7              |
|                                           |         | VIR     | 0.500   | 0.538   | 0.318    | 0.4-0.7              |
| Neutrophils count                         | 1E9/L   | COVID   | 3.155   | 3.811   | 2.483    | 2.2-4.78             |
|                                           |         | BAC     | 6.600   | 7.820   | 5.156    | 4.4-9.8              |
|                                           |         | VIR     | 3.400   | 3.721   | 2.184    | 2.4-4.6              |
| Eosinophils count                         | 1E9/L   | COVID   | 0.010   | 0.041   | 0.062    | 0-0.07               |
|                                           |         | BAC     | 0.100   | 0.159   | 0.222    | 0.02-0.2             |
|                                           |         | VIR     | 0.100   | 0.142   | 0.140    | 0.1-0.2              |
| Basophils count                           | 1E9/L   | COVID   | 0.010   | 0.016   | 0.024    | 0-0.02               |
|                                           |         | BAC     | 0.000   | 0.035   | 0.076    | 0-0.1                |
|                                           |         | VIR     | 0.000   | 0.031   | 0.051    | 0-0.1                |

| parameter                                  | unit   | disease | median  | mean    | st. dev. | inter-quartile range |
|--------------------------------------------|--------|---------|---------|---------|----------|----------------------|
| Lymphocyte %                               | 1      | COVID   | 0.235   | 0.254   | 0.121    | 0.165-0.336          |
|                                            |        | BAC     | 0.118   | 0.141   | 0.108    | 0.0607-0.195         |
|                                            |        | VIR     | 0.299   | 0.303   | 0.107    | 0.236-0.367          |
| Monocyte %                                 | 1      | COVID   | 0.096   | 0.108   | 0.059    | 0.073-0.136          |
|                                            |        | BAC     | 0.066   | 0.066   | 0.034    | 0.04-0.088           |
|                                            |        | VIR     | 0.086   | 0.090   | 0.032    | 0.07-0.106           |
| Neutrophils %                              | 1      | COVID   | 0.640   | 0.622   | 0.149    | 0.516-0.734          |
|                                            |        | BAC     | 0.756   | 0.728   | 0.157    | 0.66-0.83            |
|                                            |        | VIR     | 0.578   | 0.574   | 0.120    | 0.501-0.651          |
| Eosinophils %                              | 1      | COVID   | 0.005   | 0.008   | 0.010    | 0.00125-0.012        |
|                                            |        | BAC     | 0.012   | 0.019   | 0.025    | 0.006-0.025          |
|                                            |        | VIR     | 0.017   | 0.023   | 0.020    | 0.01-0.029           |
| Basophils %                                | 1      | COVID   | 0.004   | 0.004   | 0.003    | 0.002-0.006          |
|                                            |        | BAC     | 0.004   | 0.005   | 0.005    | 0.002-0.007          |
|                                            |        | VIR     | 0.006   | 0.006   | 0.004    | 0.004-0.009          |
| Prothrombin activity %                     | 1      | COVID   | 1.050   | 1.022   | 0.187    | 0.99-1.14            |
|                                            |        | BAC     | 0.830   | 0.755   | 0.297    | 0.55-0.99            |
|                                            |        | VIR     | 0.910   | 0.884   | 0.187    | 0.81-1               |
| Prothrombin international normalized ratio | 1      | COVID   | 0.960   | 1.010   | 0.232    | 0.92-1.01            |
|                                            |        | BAC     | 1.120   | 1.535   | 1.285    | 1-1.41               |
|                                            |        | VIR     | 1.060   | 1.128   | 0.385    | 1-1.13               |
| Glucose                                    | mmol/L | COVID   | 5.400   | 6.214   | 2.613    | 4.9-6.32             |
|                                            |        | BAC     | 6.250   | 7.561   | 4.671    | 5.1-8.3              |
|                                            |        | VIR     | 4.900   | 5.322   | 1.789    | 4.5-5.6              |
| Urea                                       | mmol/L | COVID   | 5.300   | 6.644   | 4.500    | 4.2-7.6              |
|                                            |        | BAC     | 14.200  | 17.909  | 13.447   | 7.8-24.1             |
|                                            |        | VIR     | 5.000   | 5.634   | 3.117    | 4.1-6.2              |
| Creatinine                                 | µmol/L | COVID   | 85.000  | 97.696  | 61.215   | 71-102               |
|                                            |        | BAC     | 158.000 | 248.429 | 235.189  | 87-330               |
|                                            |        | VIR     | 69.000  | 78.905  | 65.978   | 60-80                |
| Bilirubin total                            | µmol/L | COVID   | 9.000   | 10.794  | 8.161    | 7-12                 |
|                                            |        | BAC     | 10.000  | 17.223  | 32.298   | 7-16                 |
|                                            |        | VIR     | 11.000  | 18.169  | 36.088   | 8-16                 |
| Alkaline Phosphatase                       | µkat/L | COVID   | 1.080   | 1.152   | 0.366    | 0.9-1.29             |
|                                            |        | BAC     | 1.420   | 1.877   | 1.643    | 1.04-2.11            |
|                                            |        | VIR     | 1.230   | 1.470   | 1.081    | 0.99-1.58            |
| Bilirubin direct                           | µmol/L | COVID   | 3.000   | 4.039   | 3.263    | 2-5                  |
|                                            |        | BAC     | 4.000   | 9.493   | 24.331   | 2-8                  |
|                                            |        | VIR     | 4.000   | 8.522   | 26.014   | 3-6                  |
| Potassium in serum                         | mmol/L | COVID   | 4.200   | 4.210   | 0.464    | 3.9-4.5              |
|                                            |        | BAC     | 4.470   | 4.568   | 0.876    | 4-5                  |
|                                            |        | VIR     | 4.200   | 4.252   | 0.384    | 4-4.5                |
| Sodium in serum                            | mmol/L | COVID   | 139.000 | 138.525 | 3.001    | 137-140              |
|                                            |        | BAC     | 139.000 | 138.731 | 5.923    | 136-142              |
|                                            |        | VIR     | 141.000 | 140.577 | 2.862    | 139-142              |
| Alanine Aminotransferase                   | µkat/L | COVID   | 0.540   | 0.632   | 0.408    | 0.4-0.7              |
|                                            |        | BAC     | 0.410   | 0.994   | 3.956    | 0.28-0.72            |
|                                            |        | VIR     | 0.600   | 1.430   | 4.499    | 0.39-1.08            |
| Aspartate Aminotransferase                 | µkat/L | COVID   | 0.470   | 0.640   | 0.587    | 0.37-0.67            |
|                                            |        | BAC     | 0.460   | 1.272   | 4.798    | 0.32-0.82            |
|                                            |        | VIR     | 0.520   | 1.002   | 2.693    | 0.39-0.83            |
| Gamma-Glutamyltransferase                  | µkat/L | COVID   | 0.380   | 0.668   | 0.914    | 0.24-0.692           |
|                                            |        | BAC     | 0.700   | 1.515   | 2.331    | 0.37-1.6             |
|                                            |        | VIR     | 0.530   | 1.130   | 1.878    | 0.32-1.11            |
| Albumin                                    | g/L    | COVID   | 41.000  | 39.726  | 5.868    | 36.2-44              |
|                                            |        | BAC     | 34.000  | 33.516  | 7.244    | 28-39                |
|                                            |        | VIR     | 43.000  | 42.417  | 5.145    | 41-46                |
| C-Reactive Protein                         | mg/L   | COVID   | 12.000  | 40.700  | 61.102   | 4.5-49.2             |
|                                            |        | BAC     | 52.000  | 90.683  | 97.894   | 9-147                |
|                                            |        | VIR     | 4.500   | 9.299   | 19.417   | 4.5-4.5              |
| age                                        | years  | COVID   | 55.500  | 53.331  | 18.804   | 38-67.2              |
|                                            |        | BAC     | 70.000  | 66.547  | 16.894   | 56-80                |
|                                            |        | VIR     | 47.000  | 48.553  | 13.889   | 38-59                |
| sex                                        |        | COVID   | female  | 41.9%   | male     | 58.1%                |
|                                            |        | BAC     | female  | 44.5%   | male     | 55.5%                |
|                                            |        | VIR     | female  | 37.2%   | male     | 62.8%                |
